# Effects of Local Anesthetics, Antihistamines, and Glucocorticoids on Peripheral Blood Flow and Vascular Smooth Muscle

Burton M. Altura, Ph.D.,\* and Bella T. Altura, Ph.D.†

THE ANESTHESIOLOGIST'S RESOURCES include many adjuvant drugs which not only have complex effects on the autonomic and central nervous systems, but also modify tissue blood flow. Transport of any substance or drug from one region of the body to another, a distance which may be a few microns or more than a meter, must obviously be accomplished by way of the circulatory system. Since the sites of action of some of these adjuvant drugs may be partially or entirely on the blood vessel walls, directly or indirectly affecting their vascular smooth muscle, these agents can literally influence their own distribution and metabolism through their vasomotor effects on blood flow. It is therefore important for the clinician to understand precisely the primary or secondary actions which the adjuvant drugs he uses may have on peripheral blood vessels and tissue perfusion.

Only a limited number of adjuvant drugs can be adequately discussed in the space allocated for this review; the selection and orientation of the selected subject matter reflects our own prejudices and preoccupation. Fortunately, during the past few years a number of excellent reviews of particular aspects of this extensive subject have become available. Vasopressor, adrenergic and vasodilator drugs have been intensively covered.<sup>11,14,28,48,66,148,150,178</sup> The peripheral vascular actions of angiotensin and prostaglandins have also been reviewed recently.<sup>49,51,98,119,122,150,164,176</sup> In view

of these excellent sources of information, the present review is limited to a discussion of adjuvant drugs other than the foregoing.

The maintenance of circulatory homeostasis depends to a large extent on the responsiveness of the peripheral blood vessels to the sympathetic nervous system and circulating neurohumoral substances. Certain drugs which can interfere with these normal responses can seriously affect blood pressure, tissue blood flow, and cardiac output, especially in patients subjected to anesthesia and stress. We have focused on the peripheral vascular effects of local anesthetics, antihistamines, and glucocorticoids in this review, since these three classes of structurally different molecules 1) share certain common physiologic and pharmacologic properties which are probably important in relation to their actions on peripheral vessels—namely, potentiation of the constrictor actions of catecholamines<sup>15,150</sup> and stabilization of cell membranes<sup>58,146</sup>; 2) have not heretofore been compared with respect to their actions on blood vessels and flow.

## Local Anesthetics

### IN-VIVO ACTIONS ON REGIONAL BLOOD FLOW AND MICROCIRCULATION

In general, local anesthetics stabilize cell membranes.<sup>58,132,146</sup> It is this action on excitable membranes of nerves and muscles<sup>132,146</sup> which is thought to account for the analgesic actions of these drugs. It is now well established that local anesthetics block propagation of the nerve impulse by altering ionic conductance, thus stabilizing the axon membrane.<sup>132</sup> Although intravenous local anesthetics are regularly used in the treatment of ventricular arrhythmias, they must be administered judiciously, since one of their common side

\* Associate Professor of Anesthesiology and Physiology.

† Instructor in Anesthesiology.

Received from the Departments of Anesthesiology and Physiology, Albert Einstein College of Medicine of Yeshiva University, Bronx, New York 10461. The original investigations described in this review were supported by Research Grants HL-12462 and HL-11391 from the National Institutes of Health, USPHS.

TABLE 1. Comparative Effects of Local Anesthetics on Peripheral Blood Flow in Mammals and Man

| Local Anesthetic | Relative Potency* | Regional Blood Flow† | Microcirculatory Flow | References                      |
|------------------|-------------------|----------------------|-----------------------|---------------------------------|
| Procaine         | 1                 | ↑↓                   | ↑                     | 6,30,44,110,136,<br>138,149,160 |
| Lidocaine        | 4                 | ↑↓                   | ↑                     | 6,30,37,56,63,<br>89,120,165    |
| Mepivacaine      | 4                 | ↑↓                   | ↑↓                    | 1,15,62,63,<br>94,125           |
| Tetracaine       | 25                | ↑                    | ↑↓                    | 15,85,101                       |

\* Based on *in-vitro* analgesic properties of local anesthetics in the isolated frog sciatic-nerve preparation.

† ↑ = Vasodilatation and/or increased blood flow (decreased peripheral resistance); ↓ = vasoconstriction and/or decreased blood flow (increased peripheral resistance). Size of arrow indicates relative dominance of effect.

effects is hypotension. Procaine is currently being used much less frequently than lidocaine for this purpose because it is prone to induce much greater hypotension.<sup>14</sup> Procaine administered intravenously is thought to exert a profound depressant effect on peripheral blood vessels.<sup>58</sup> It is generally believed, but by no means certain, that most local anesthetics (except cocaine and mepivacaine) relax vascular smooth muscle,<sup>58,93,150</sup> and can produce peripheral vasodilatation (table 1). Direct observations of the living microvascular system indicate that local anesthetics such as procaine and lidocaine, when applied topically to mammalian blood vessels, do indeed promote relaxation or dilatation of arterioles, metarterioles, and precapillary sphincters, whereas mepivacaine and tetracaine have mixed or biphasic effects which are dose-dependent.<sup>6,15,20</sup> Although lidocaine, where investigated, has been demonstrated to exert predominantly peripheral vasodilator actions,<sup>6,15,58,150</sup> there is one report suggesting that it can produce constriction of lobar venous vessels of the lung in intact dogs.<sup>93</sup> It should be stressed that the latter effect was found in venous smooth muscle; this investigator could not demonstrate such a contractile effect on the intact pulmonary arteries.<sup>93</sup> These contractions, where they occur, could be indirect, since certain local anesthetics such as lidocaine have been demonstrated to potentiate the responses of vascular smooth muscle to catecholamines.<sup>6,150</sup>

#### IN-VITRO ACTIONS ON BLOOD VESSELS

Both procaine and lidocaine can contract isolated segments of cat and rat anterior mesenteric veins.<sup>136a</sup> Since these contractions could not be abolished by specific cholinergic-, adrenergic-, histaminergic-, or serotonergic-blocking agents,<sup>136a</sup> it would appear that procaine and lidocaine may induce contraction of some venous smooth muscles by a direct action. It has been suggested that some or all of these contractile actions in *venous* smooth muscle are not only concentration- but tone-dependent<sup>17</sup>; low concentrations increase tension and/or spike frequency, while high concentrations induce relaxation. Although we have examined a number of relaxed, isolated *arteries* from dogs, rats, rabbits, and cats (*e.g.*, carotids, femorals, mesenterics, renals, aortas), none that would contract in the presence of procaine, lidocaine, hexylcaine, or even mepivacaine in concentrations to 250  $\mu\text{g/ml}$  could be found.<sup>19,20</sup> These agents can, however, exert effects on hormone- and drug-induced contractions of these isolated mammalian blood vessels.<sup>15,20,68,150</sup> A variety of drug- and hormone-induced contractions, including depolarizing concentrations of potassium chloride, of isolated as well as intact vessels can be dose-dependently relaxed by a variety of local anesthetics (*i.e.*, procaine, lidocaine, tetracaine, mepivacaine) in concentrations equal to or greater than 0.5  $\mu\text{g/ml}$ , the thresholds and magnitudes being dependent

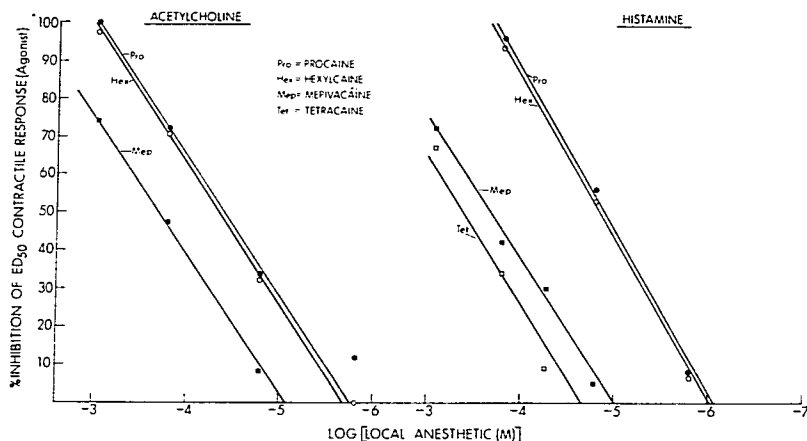

FIG. 1. Log concentration-effect curves of the percentage inhibition to ED<sub>50</sub> isometric contractile responses of acetylcholine and histamine in rabbit aortic strips produced by different local anesthetics (procaine, ●; hexylcaine, ○; mepivacaine, ■; tetracaine, □). All of the local anesthetics used were hydrochloride salts.

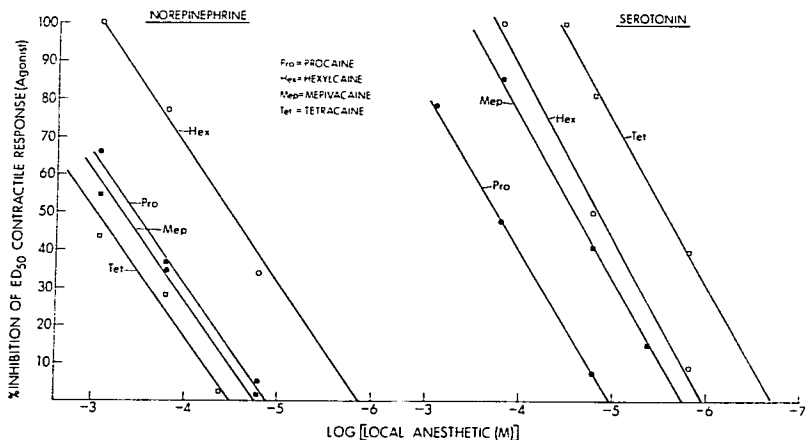

FIG. 2. Log concentration-effect curves of the percentage inhibition to ED<sub>50</sub> isometric contractile responses of norepinephrine and serotonin in rabbit aortic strips produced by different local anesthetics (procaine, ●; hexylcaine, ○; mepivacaine, ■; tetracaine, □).

upon type of vasoactive stimulant and local anesthetic. Similar actions were found in all types of isolated arteries investigated to date.<sup>59</sup> These observations support previous findings of others<sup>150</sup> and, in addition, indicate that such vascular effects may not be species-dependent.

In view of the findings suggesting that local anesthetics induce nonspecific inhibition of vascular tone, it was of interest to determine whether local anesthetics, in general, could affect a variety of pharmacologic receptor systems in vascular smooth muscle.<sup>15,20,64</sup> Figures 1 and 2 demonstrate that a variety of local anesthetics can inhibit drug-induced contractions of blood vessels. However, such data indicate that 1) relatively high anesthetic concentrations ( $>10^{-5}M$ ) are needed; 2) the relative potencies for these inhibitory actions do not seem to be related to the true local anesthetic potencies, as assessed by classic techniques; 3) contractions induced by different agonists are differentially inhibited by local anesthetics. It is of great interest (figs. 1 and 2) that the regression lines for all of the local anesthetic-induced inhibitory effects are parallel, suggesting that different local anesthetics may be acting on vascular muscle by the same mechanism. Figures 3 and 4 show the typical effects that increasing anesthetic concentrations exert on amine- and peptide-induced contractions of isolated vascular smooth muscle. Such data, which have been found by others as well,<sup>68</sup> indicate that low concentrations of a variety of local anesthetics (e.g., procaine, lidocaine, mepivacaine, and tetracaine) seem to produce parallel shifts to the right of the amine- and peptide-induced contractile responses, while higher concentrations produce shallowing of the sigmoid log concentration-effect curves concomitant with reductions in maximum response. The former effect has been attributed by some workers to changes in the affinities of the various agonists for their respective receptive sites in vascular smooth muscle,<sup>68</sup> while the latter has been hypothesized to be due to an effect of local anesthetics on mobilization of calcium ions.<sup>68</sup> Local anesthetics have been shown to exert significant antagonistic effects on movement of calcium ions in a variety of cell types,<sup>33,43,46,49,61,102,113,153</sup> including smooth muscle.<sup>63,80,121</sup>

However, since alterations of vascular smooth muscle cell metabolism can also produce parallel shifts of drug-induced responses,<sup>15,16,21</sup> local anesthetics may be inducing these apparent changes in drug-receptor kinetics by acting on events beyond the agonist receptor sites: local anesthetics have been shown not only to penetrate cell membranes,<sup>43,122,146</sup> but also to depress intracellular oxidation of glucose in brain homogenates<sup>152</sup> and uptake of oxygen in cultured cells.<sup>66</sup>

### Antihistamines

Antihistamines are widely prescribed in the treatment of motion sickness, urticaria and other allergic skin conditions, hay fever, vasomotor rhinitis, and other diseases where an allergic background may be suspected. They are also administered to treat allergic manifestations prior to or during anesthesia and widely used as preoperative sedatives. Some antihistamines have been advocated for the treatment of parkinsonism. The latter two indications for antihistamines are probably related to the ability of some of these molecules to induce depression of the CNS and muscle relaxation, respectively.<sup>173</sup> Antihistamines comprise a group of drugs which counteract or prevent the pharmacologic actions specific to histamine. These agents are thus not thought to produce direct pharmacologic agonist effects which are categorically opposite to those of histamine, as does epinephrine, which will relax intestinal or bronchiolar smooth muscle contractions induced by histamine by a direct pharmacologic action.

#### SPECIFICITY OF ANTIHISTAMINES

The diamine, histamine, is a powerful stimulant of smooth muscle from many organs, such as the already mentioned intestine and bronchioles, as well as arterial and venous smooth muscle. Normally, the latter vascular actions can be attenuated by low concentrations of various classic, clinically available antihistaminic compounds such as diphenhydramine (Benadryl), chlorpheniramine (Chlor-Trimeton), pyrilamine (Neoantergan), promethazine (Phenergan), and tripeleminamine (Pyribenzamine). Other pharmacologic effects induced by histamine, such as stimulation of

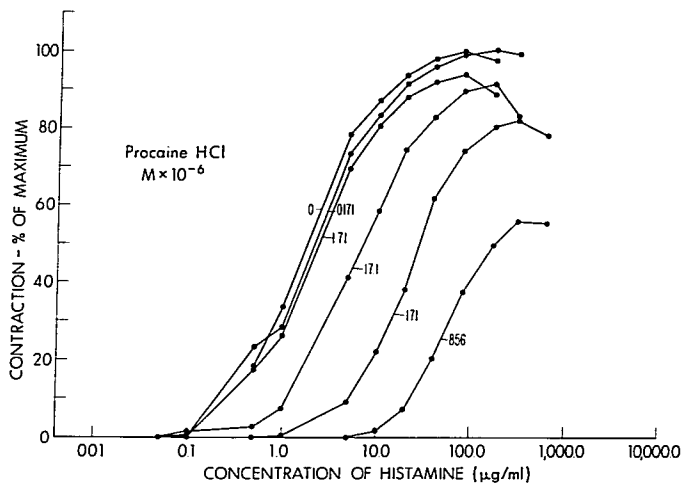

FIG. 3. Effect of procaine on concentration-effect curves of histamine in rabbit aortic strips. 0 = control. Procaine was incubated with tissue for 15 minutes prior to obtaining cumulative dose-response curves.

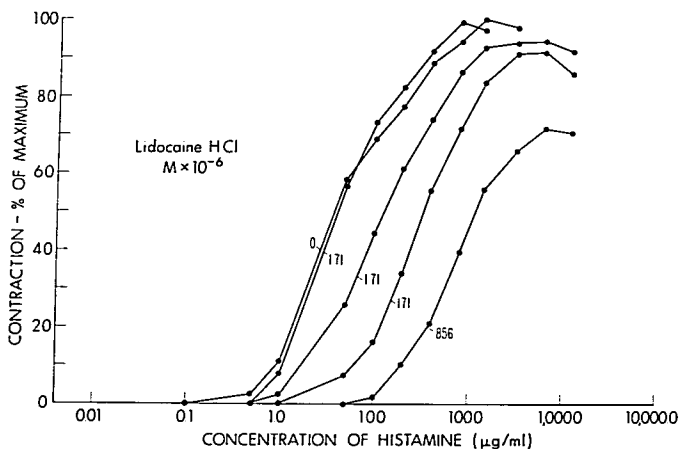

FIG. 4. Effect of lidocaine on concentration-effect curves of histamine in rabbit aortic strips. 0 = control. Lidocaine was incubated with tissue for 15 minutes prior to obtaining cumulative dose-response curves.

TABLE 2. Important Pharmacologic Properties of Antihistamines Which Can Affect Peripheral Blood Vessels and Flow

| Pharmacologic Property                              | References           |
|-----------------------------------------------------|----------------------|
| Local anesthetic action                             | 60,83,116,146        |
| Analgasic action                                    | 87,104               |
| Quinidine-like action                               | 53,60                |
| Anticholinergic effects                             | 53,111               |
| Anti-adrenergic effects                             | 53,61,67,111         |
| Anti-serotonin effects                              | 53,167               |
| Histamine liberation                                | 53,123,162           |
| Inhibit ion transport                               | 96,97,127,146        |
| Depolarize nerve and muscle membranes               | 57,112,118           |
| Potentiate cardiovascular effects of catecholamines | 4,10,29,30,75,90,114 |
| Effects on cell metabolism                          | 78,96,97,127         |
| Partial inhibition of reflex vasodilatation         | 75,79,108,158,159    |

acid secretion by the stomach, increased heart rate, or inhibition of (rat) uterine contractions cannot be antagonized by the aforementioned antihistamines. Recently, an antagonist, burimamide, which will selectively block the effects of histamine on acid secretion, heart rate, and uterine contractions has been synthesized.<sup>45</sup> This development has given added support to the idea that histamine can act through more than one type of receptor.<sup>35</sup> Histamine receptors blocked by the classic antihistamines have been termed "H<sub>1</sub> receptors," while those blocked by burimamide have been termed "H<sub>2</sub> receptors."<sup>35,45</sup> Depressor responses to intravenous injection of histamine are not completely blocked by either H<sub>1</sub> or H<sub>2</sub> receptor blockers, but seem to require a combination of both types of antihistamines.<sup>45</sup> It has therefore been suggested by Black and co-workers<sup>45</sup> that the cardiovascular effects of histamine are subserved by both H<sub>1</sub> and H<sub>2</sub> receptors.

#### MICROVASCULAR EFFECTS

Complete antagonism of the microcirculatory actions induced by histamine, *i.e.*, vasodilatation of terminal arterioles, metarterioles, precapillary sphincters, and muscular venules, requires relatively high concentrations of either the classic H<sub>1</sub> blockers or burimamide (>10 mg/kg).<sup>15,29</sup> But these and even lower

antihistaminic concentrations (2–5 mg/kg) have a dose-dependent constrictor action on various muscular components of the microvasculature in a variety of regional vascular beds (including the cutaneous circulation) in rodents as well as all other mammalian species thus far investigated.<sup>8,11,15,29–31,41,84,134</sup> These, and other observations,<sup>7,9,10,12,15,18,19,20</sup> have led us to conclude that most antihistamines (H<sub>1</sub> and H<sub>2</sub> receptor blockers) have direct musculotropic effects as well as other pharmacologic effects on vascular smooth muscle exclusive of their antagonism of histamine. For those who use these drugs it is important to be aware of some recently reported direct and indirect vascular actions of antihistaminic compounds, particularly those which affect vessel tone and reactivity (table 2).

Most antihistamines not only induce direct contraction of regional microvessels in blood concentrations of the order attained by usual oral or parenteral doses,<sup>8,10,17,73</sup> but in addition, potentiate the constrictor and pressor actions of catecholamines.<sup>29,75,90,114</sup> The latter phenomenon is thought to be due to the cocaine-like effects of these compounds on the neuronal uptake of norepinephrine.<sup>75,90</sup> It is of interest that certain drugs such as corticosteroids and beta-adrenergic blockers, in pathologic states such as endotoxemia, can profoundly potentiate the microvascular constriction induced by antihistaminics.<sup>10</sup> Therefore, caution should be exercised in using antihistaminics in these circumstances.

The ability of antihistaminics to induce microvascular contraction does not appear to be quantitatively related to their true antihistaminic potencies.<sup>10</sup> Although a parallel relationship between epinephrine-, norepinephrine-, and antihistamine-induced contractions exists in many experimental situations, a common receptor site is not involved.<sup>10</sup> However, an accessory (binding) alpha-adrenergic receptor site may be involved in antihistamine-induced microvascular constrictions.<sup>10</sup>

#### MACROVASCULAR EFFECTS

Recent *in vitro* studies, performed on a variety of arteries (from rabbits, cats, dogs, man),<sup>7,18–20</sup> indicate that most types of anti-

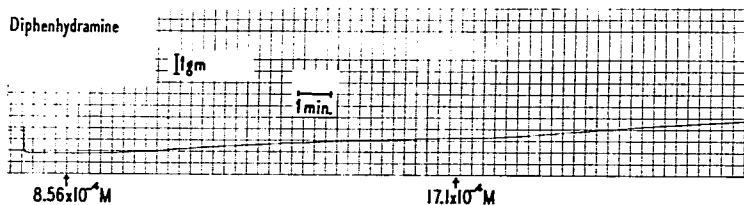

FIG. 5. Representative tracing of the dose-dependent contractile action of diphenhydramine on a rabbit aortic strip.

histaminics (*e.g.*, promethazine, diphenhydramine, chlorpheniramine, pyrilamine, and tripeleennamine) induce dose-dependent contractile responses in these isolated mammalian blood vessels (fig. 5). These data, therefore, lend support to the hypothesis that many antihistaminics induce contraction of vascular smooth muscle by a direct action, *i.e.*, possibly by depolarization of the smooth muscle cell membrane coupled with a release of bound calcium ions. That these agents can exert a direct contractile action on microcirculatory blood vessels may help to explain their inhibitory actions against mediators other than histamine in inflammatory states.<sup>10,123</sup>

Apart from direct vascular actions of these compounds, data are accumulating to indicate that most, if not all, of the classic  $H_1$ -receptor blockers may not be *specific* antagonists of histamine even in macrovascular smooth muscle (*e.g.*, arteries and veins).<sup>7,12,15</sup> *In-vitro* studies performed in our laboratory on a variety of arterial vessels from different mammals, including man, indicate that 1) True competitive antagonism (*i.e.* parallel right shifts of dose-response curves with no reduction in maximum response) exists over very limited antihistaminic dose ranges (see, *e.g.*, figs. 6-8); 2) Non-competitive histamine antagonism (*i.e.*, shallowing of dose-response curves concomitant with reduction in maximum response) is seen over rather wide antihistaminic dose ranges (figs. 6-8); 3) Certain antihistaminics such as tripeleennamine, which has been used in studies involving reflex vasodilatation (to unmask histamine),<sup>75,79,104,158,159</sup> appear to act noncom-

petitively with histamine on certain types of arterial smooth muscle<sup>15</sup> exclusively; 4) Most of the antihistaminics (*e.g.*, promethazine, chlorpheniramine, diphenhydramine, pyrilamine, tripeleennamine), although somewhat more potent against histamine than other vasotropic agonists,<sup>7,12,15</sup> can also effectively antagonize, both competitively and noncompetitively, agonists such as catecholamines, serotonin, and acetylcholine (see, *e.g.*, figs. 9 and 10). This antagonism of agonists other than histamine appears to be related to their well known antiadrenergic, antiserotonergic and anticholinergic properties (table 2); (5) Antihistaminics can dose-dependently relax drug-induced contractions of a variety of mammalian blood vessels.<sup>7,12-15,67,174</sup>

Since antihistaminics share with local anesthetics the ability to stabilize cell membranes<sup>146</sup> and to inhibit the movement of  $Ca^{++}$ ,<sup>76,146</sup> it is probably these properties which are responsible for inhibition and reversal of drug-induced contractions of regional blood vessels. However, some of the other properties of the antihistaminics listed in table 2 may also have roles in the inhibitory actions observed in peripheral blood vessels.

Overall, the studies reviewed here emphasize that antihistaminics may have important effects on peripheral blood vessels and blood flow in addition to the principal action for which they are usually given. These vasomotor actions must be considered in their clinical use and when used as experimental tools to define a physiologic or pharmacologic response as being histaminic or otherwise in the cardiovascular system.

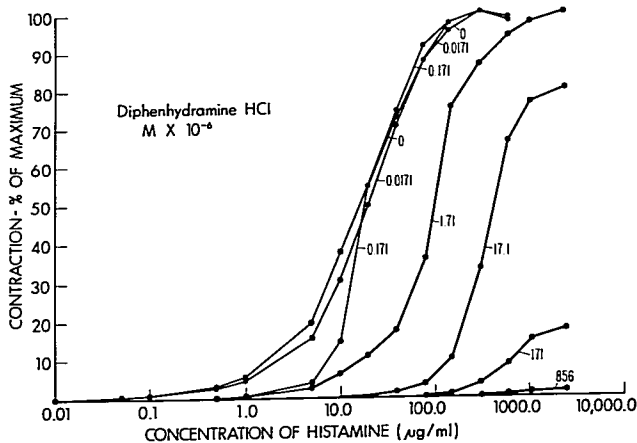

FIG. 6. Effect of diphenhydramine on concentration-effect curves of histamine in rabbit aortic strips. 0 = control. Antagonist was incubated with tissue here (and in figures 7-10) for 15 minutes prior to obtaining cumulative dose-response curves.

### Glucocorticoids

The adrenal cortex synthesizes two major types of steroids, corticosteroids and androgens. There are two types of corticosteroid hormones, glucocorticoids and mineralocorticoids. Since the amount of stored corticosteroids in the adrenal cortex is insufficient to support normal body functions, these hormones must be synthesized at a turnover rate of several times per day.<sup>77</sup> The rate of secretion of the corticosteroids is dependent upon the rate of biosynthesis, which in turn is under the regulatory influence of hormones such as ACTH, angiotensin II and cyclic adenosine 3',5'-monophosphate (cyclic AMP).<sup>77</sup> Stressful situations such as systemic infections, trauma, blood loss, and circulatory shock, among others, stimulate increased corticosteroid secretion.

The adrenal cortex, with its corticosteroid hormones, is considered by many investigators to be the pivotal organ in the maintenance of homeostasis. So, too, the natural and synthetic adrenal steroids have become a major therapeutic resource in augmenting

many of the body's defense mechanisms against stress. Although the subject of homeostasis and host defense merits further discussion, the remaining space in this section is limited to the circulatory actions of the glucocorticoids, their related cellular actions, and their role and use in disease states associated with altered blood flow. Nor is an attempt made to review here all of the reported physiologic and pharmacologic effects of the glucocorticoid hormones. This information can be found in many excellent articles and monographs.<sup>40,50,55,77,93,157</sup>

Many reports in the literature conclude or infer that glucocorticoids have important actions on peripheral blood vessels, blood flow, endothelial cells, and the formed elements of the blood (table 3). Despite this common impression, however, it should be clearly stated that there is no convincing evidence that either physiologic or pharmacologic concentrations of glucocorticoids can directly alter vessel diameters or peripheral blood flow.<sup>4,10,11,21-23,25,98,107,112,114,150,152</sup> A more likely interpretation is that although physiologic concentrations of the glucocorticoid hor-



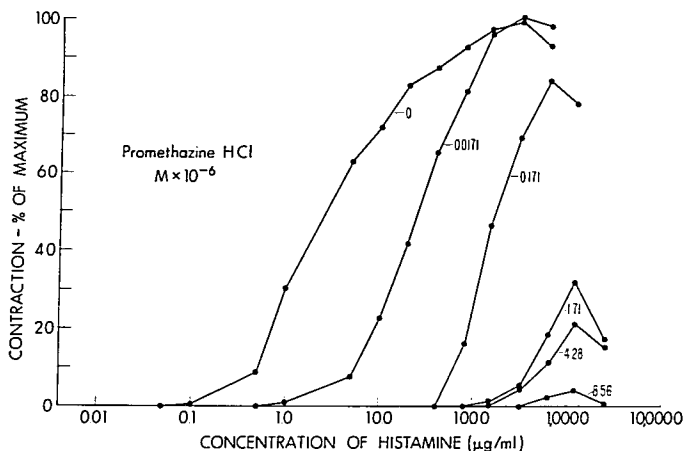

FIG. 7. Effect of promethazine on concentration-effect curves of histamine in rabbit aortic strips.

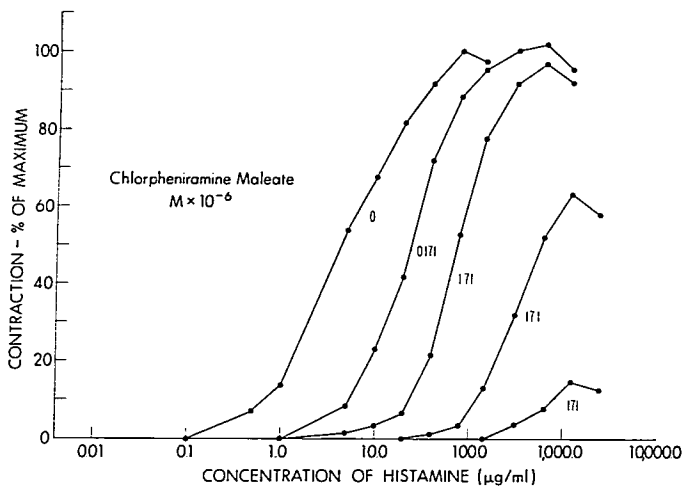

FIG. 8. Effect of chlorpheniramine on concentration-effect curves of histamine in rabbit aortic strips.

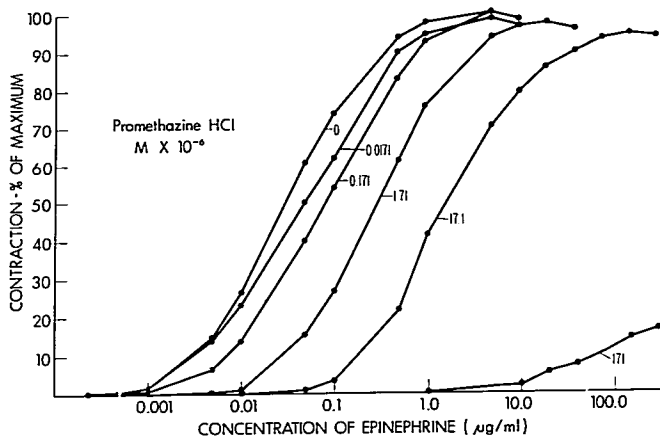

FIG. 9. Effect of promethazine on concentration-effect curves of epinephrine in rabbit aortic strips.

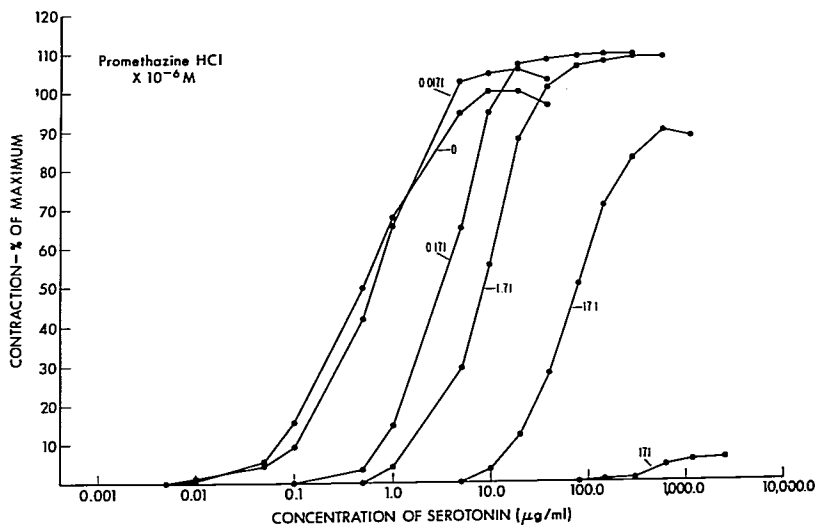

FIG. 10. Effect of promethazine on concentration-effect curves of serotonin in rabbit aortic strips.

TABLE 3. Important Physiologic and Pharmacologic Actions of Glucocorticoids Which Can Affect Peripheral Blood Vessels, Blood Flow, Endothelium and Formed Blood Elements

| Cellular Effect                                                        | References                                            |
|------------------------------------------------------------------------|-------------------------------------------------------|
| Potentialization of constrictor and pressor actions of catecholamines* | 4,10,11,21,23,36,42,69,70,100,<br>103,105,131,142,180 |
| Attenuation of certain vasodilator actions*                            | 4,154,177,179                                         |
| Restoration of vascular reactivity in stress*†                         | 4,70,177,179,180                                      |
| Inhibition of histamine binding to tissues*†                           | 139,141,156,175                                       |
| Inhibition of histamine synthesis and alteration of its metabolism*†   | 54,130,139,156                                        |
| Stabilization of endothelial and cell membranes*†                      | 146,177,179,180                                       |
| Enzyme induction and various metabolic actions*†                       | 40,77,93,157                                          |
| Inhibition of leukocyte sticking, diapedesis, and accumulation*†       | 3,36,80,137                                           |
| Stimulation and inhibition of reticuloendothelial system function*†    | 21,161                                                |
| Clearance of lysosomal enzymes and toxins from circulation*†           | 74,128,172                                            |
| Inhibition of platelet aggregation†                                    | 115,124                                               |
| Stabilization of lysosomal membranes†                                  | 72,91,155,166                                         |
| Attenuation of vasoconstrictor action†                                 | 21-23, 126, 135                                       |

\* These effects can be attained *in vivo* with concentrations of steroid at, near, physiologic.

† These effects can be attained *in vivo* with pharmacologic concentrations of steroid.

mones do not, by themselves, have direct actions on vascular smooth muscle,<sup>4,11,150</sup> they do alter blood-vessel caliber and flow in the microcirculation by indirect actions (*e.g.*, on circulating catecholamines, histamine, and kinins; maintenance of endothelial tone and integrity; maintenance of blood fluidity by acting on the formed elements; maintenance of reticuloendothelial system integrity) (references in table 3).

#### MECHANISMS OF GLUCOCORTICOID VASOTROPIC ACTIONS

It is generally believed that low (probably physiologic) doses of the steroid hormones substantially and specifically potentiate the contractile actions of catecholamines on micro- and macrovascular smooth muscle.<sup>42,100,140</sup> But the mechanisms are largely uncertain. Besse and Bass suggest that glucocorticoids increase the affinity of adrenergic receptors for catecholamines,<sup>42</sup> but others have found that these steroids have no such effect on the affinity of catecholamines for their receptors in vascular muscle.<sup>81</sup> Kalsner, using rabbit aortic strips, concluded that this steroid-induced potentiation of catecholamines results from inhibition of catechol-O-methyltransferase activity.<sup>100</sup> Other investigators could find no evidence to support the latter hypothesis.<sup>81,109</sup> Williams and Hudgins<sup>109</sup> have recently suggested that the steroid-induced

potentiation may be due to a limitation of transmembrane movement of catecholamines. All of the latter studies, however, either employed cortisol (hydrocortisone) exclusively or tested a limited number of vasoactive agents other than epinephrine and norepinephrine. In the context of this experimental background, it has recently been reported that: 1) some glucocorticoids, when given locally and systemically, acutely, can potentiate the constrictor action of antihistamines, serotonin, and methoxamine (non-catecholamines) on rat mesenteric microvessels<sup>4,10,11,29</sup>; 2) multiple doses of glucocorticoids can potentiate the *in-vivo* constrictor actions of vasopressin as well<sup>4</sup>; 3) methylprednisolone, which is almost pure glucocorticoid in action,<sup>77</sup> in contrast to cortisone and hydrocortisone, which have both glucocorticoid and mineralocorticoid properties, fails to potentiate catecholamine or vasopressin constrictor action in the microcirculation over a 10,000-fold change in dose when given either topically or intravenously.<sup>21,23</sup> These findings in the microcirculation could be used to suggest that, physiologically, 1) steroid molecules such as cortisone and hydrocortisone which show mixed glucocorticoid and mineralocorticoid properties<sup>77</sup> do not exclusively potentiate the constrictor actions of epinephrine and norepinephrine, as has been heretofore promulgated by some<sup>42,100,140</sup>; 2) the pure glucocorticoid prop-

erties of the steroids *per se* may not be associated with potentiation of the vascular actions of catecholamines,<sup>21,23</sup> as has been suggested previously by others.<sup>42,100,140</sup> Further work, using a variety of blood vessels and pure glucocorticoids (with high glucocorticoid potency) *in vivo* and *in vitro*, will, however, be required before these controversial issues can be clarified.

#### THE INFLAMMATORY RESPONSE AND MICROCIRCULATORY EFFECTS

Glucocorticoids are widely used, clinically, for their attenuation of many aspects of acute inflammatory responses. They are probably effective in these situations because they can influence, by a variety of their actions (table 3), the cardinal signs of local tissue injury or inflammation which develop in the microvessels (increased microvascular caliber; release of vasoactive mediators such as histamine and kinins; separation of endothelial cells; leukocytic sticking, diapedesis and aggregation; platelet aggregation; release of lysosomal hydrolases). To illustrate: Potentiation by glucocorticoids of the constrictor actions of endogenous catecholamines would attenuate histamine and kinin-induced local vasodilation, as well as modify movement of leukocytes and plasma across the capillary and venular walls. Attenuation of histamine and kinin-induced vasodilation would restore microcirculatory flow toward normal. Inhibition of tissue histamine binding and synthesis by glucocorticoid hormones would prevent further vasodilatation and separation of endothelial cells. (Release of histamine in acute inflammatory conditions is thought to play an important role in inducing capillary permeability changes.<sup>123</sup>) Inhibition of the accumulation of leukocytes by these steroid hormones would tend to prevent the release of other vasoactive mediators and lysosomal hydrolases from the leukocytes, which could exacerbate the local tissue injury, etc.<sup>92</sup> It thus becomes apparent that the amelioration of the acute inflammatory responses by the glucocorticoid hormones can, in one way or another, be attributed to the actions these steroids exert on the various components of the walls of microvessels (smooth muscle cells, endothelial cells) and the formed elements that they contain. Since

all of these beneficial actions can occur very rapidly, it appears unlikely that glucocorticoids ameliorate inflammation by virtue of their effects on cell metabolism or cytoplasmic receptors.<sup>157</sup>

#### GLUCOCORTICIDS IN TREATMENT OF SHOCK

Although glucocorticoids also play important roles in growth, immune reactions, cell differentiation, and in the modulation of many hormones,<sup>10,50,55,77,93,157</sup> the remainder of this discussion is limited to the role of these steroids in the therapy of circulatory shock as mediated via their peripheral vascular actions. When administered in massive doses (equivalent to 10–30 mg/kg methylprednisolone), glucocorticoids are widely reported as beneficial in the treatment of various experimental and clinical low-flow states.<sup>21,32,39,71–73,82,91,98,106,107,109,117,165</sup> Several mechanisms have been advanced to account for this protective effect in shock, but at present there is no agreement as to the precise mechanism(s) involved.<sup>39,71,129,141</sup> The more prominent theories include stabilization of lysosomal membranes,<sup>73,79,91,152</sup> metabolic actions,<sup>129,145</sup> increase in cardiac output,<sup>171</sup> inhibition of a myocardial depressant factor (MDF),<sup>73,106</sup> potentiation of the vasoconstrictor action of catecholamines,<sup>22</sup> alpha-adrenergic blockade,<sup>109</sup> and vasodilator action.<sup>109</sup> Very recently, considerable evidence which appears to rule out at least some of the above theories, positive inotropic action, potentiation of catecholamines, or a vasodilator action, as contributing factors to the salutary effects of the steroids in circulatory shock has been accumulating.<sup>21,29,98,129,152</sup> Despite the findings that lysosomal hydrolases can be released in shock and that massive doses of glucocorticoids can prevent this release if given prior to shock,<sup>72,73,91,152,166</sup> several investigators have failed to find an increase in lysosomal enzymes in the sera and tissues of both untreated man and animals.<sup>143,147</sup> Furthermore, administration of lysosomal or acid hydrolases to normal animals does not produce circulatory shock unless the reticulo-endothelial system (RES) is blocked or partially excluded from the circulation.<sup>74,129</sup> These observations must of necessity cast doubt on the role stabilization of lysosomal membranes plays in the amelioration of shock

by glucocorticoids. As to specific alpha-adrenergic blockade, there is currently no clear-cut evidence to support this hypothesis, either.

Although there is, at present, no compelling evidence for a hemodynamic basis for glucocorticoid amelioration of shock syndromes, it must be acknowledged that since microcirculatory and vascular smooth muscle dysfunction,<sup>28,47,6,178</sup> as well as RES phagocytic depression,<sup>21-27</sup> are known to play fundamental roles in the lethality of the shock progression, these entities must also be considered. In this context, there is recent evidence which suggests that glucocorticoids exert certain pharmacologic effects on both vascular smooth muscle and RES function, the nature of which may be important as contributing factors to protection in circulatory shock.<sup>21-23</sup> Briefly, work in our laboratory demonstrated by direct, quantitative *in-vivo* microscopy that massive doses of both hydrocortisone sodium succinate (HC) (300 mg/kg) and methylprednisolone sodium succinate (MP) (30 mg/kg) effectively restored the severely constricted arterioles of rats subjected to hemorrhagic and intestinal-ischemia shock to near normal during, as well as following, intravenous infusion of these steroids.<sup>21-23</sup> Our group also demonstrated that both steroids (*i.e.*, HC and MP in pharmacologic doses) dose-dependently inhibited epinephrine-, norepinephrine-, vasopressin-, serotonin-, and angiotensin-induced contractions, as well as displaced the log dose-response curves of these vasoactive agents, nonspecifically, to the right in studies of arterioles *in vivo* and arterial smooth muscle *in vitro*. HC (300 mg/kg) and MP (30 mg/kg) not only significantly improved survival rates of rats subjected to two types of circulatory shock, when administered after the shock was induced, but effectively restored RES phagocytic function to normal. These findings suggested to us that pharmacologic doses of glucocorticoids may confer protection in shock by: 1) preventing the intense peripheral vasoconstrictor action of the many vasoactive constrictor substances released in shock (*e.g.*, catecholamines, vasopressin, serotonin, angiotensin), and 2) aiding in the restoration of normal RES phagocytic function. This concept, if sustained, could identify a rational hemodynamic basis, at the microcirculatory

level, for glucocorticoid therapy in circulatory shock.

### Concluding Comment

We have attempted in this brief review to focus on recent advances in the understanding of physiologic and pharmacologic effects of local anesthetics, antihistamines, and glucocorticoids on peripheral blood vessels. Probably, more questions are raised than answers given. If so, this is likely to be a reflection of the current state of our understanding of this subject. However, it is interesting that many of the more recent studies reviewed have demonstrated that, in addition to potentiating catecholamines and stabilizing cell membranes, these three classes of molecules can, in pharmacologic doses, attenuate contractions of blood vessels induced by a variety of neurohumoral and vasoactive agents. Although substantial progress is being made toward establishing the entire profile of peripheral vascular actions of these classes of molecules, there remain important areas that are frankly controversial or, at best, unclear. These uncertainties are not surprising since vascular smooth muscle is heterogeneous in nature<sup>11,14,29,150</sup> and, as such, can differ in responses to the same drug within adjacent microvascular smooth muscle cells,<sup>11,14</sup> as well as between segments within one and the same bed.<sup>3,17,151</sup>

### References

1. Åberg G, Dhunér K-G: Effects of mepivacaine (Carbocaine®) on femoral blood flow in the dog. *Acta Pharmacol Toxicol* 31:267-272, 1972
2. Åberg G, Wahlström B: Mechanical and electrophysiologic effects of some local anesthetic agents and their isomers on the rat portal vein. *Acta Pharmacol Toxicol* 31: 255-266, 1972
3. Allison F, Smith MR, Wood WB: Studies on the pathogenesis of acute inflammation. II. The action of cortisone on the inflammatory response to thermal injury. *J Exp Med* 102:669-676, 1955
4. Altura BM: Role of glucocorticoids in local regulation of blood flow. *Am J Physiol* 211: 1393-1397, 1966
5. Altura BM: Differential actions of polypeptides and other drugs on coronary inflow vessels. *Am Heart J* 72:709-711, 1966
6. Altura BM: Evaluation of neurohumoral substances in local regulation of blood flow. *Am J Physiol* 212:1447-1454, 1967

7. Altura BM: Effects of antihistamines on isolated arterial smooth muscle. *Pharmacologist* 10:164, 1968
8. Altura BM: Antihistamine constriction in mouse skin microcirculation. *J Pharm Pharmacol* 20:71-72, 1968
9. Altura BM: Insight into the contractile actions of antihistamines on microvascular smooth muscle. *Bibl Anat* 10:349-354, 1969
10. Altura BM: Contractile responses of microvascular smooth muscle to antihistamines. *Am J Physiol* 218:1082-1091, 1970
11. Altura BM: Chemical and humoral regulation of blood flow through the precapillary sphincter. *Microvasc Res* 3:361-384, 1971
12. Altura BM: Histamine-antihistamine antagonism in isolated arterial smooth muscle. *Proc XXV Int Cong Physiol Sci (Munich)*, abstracts, 1971, p 15
13. Altura BM: Biochemistry of vascular smooth muscle, Physiology and Pathology of Vascular Response Workshop. Edited by A Distler, H Grobecker, VA W Kreyer, et al. *Arzneim Forsch* 23:10-11, 1973
14. Altura BM: Selective microvascular constrictor actions of some neurohypophysial peptides. *Eur J Pharmacol* 24:49-60, 1973
15. Altura BM: Vascular responsiveness. *Microcirculation*. Edited by G Kaley, BM Altura. Baltimore, University Park Press (in press)
16. Altura BM, Altura BT: Differential effects of substrate depletion on drug-induced contractions of rabbit aorta. *Am J Physiol* 219:1698-1705, 1970
17. Altura BM, Altura BT: Heterogeneity of drug receptors in different segments of rabbit thoracic aorta. *Eur J Pharmacol* 12:44-52, 1970
18. Altura BM, Altura BT: Comparative contractile actions of antihistamines (AHS) on contraction of isolated vascular smooth muscle. *Pharmacologist* 15:214, 1973
19. Altura BM, Altura BT: Contractile actions of antihistamines on isolated arterial smooth muscle. *J Pharmacol Exp Ther* (in press)
20. Altura BM, Altura BT: Heterogeneity of vascular smooth muscle. *Microcirculation*. Edited by G Kaley, BM Altura. Baltimore, University Park Press (in press)
21. Altura BM, Altura BT: Peripheral vascular actions of glucocorticoids and their relationship to protection in circulatory shock. *J Pharmacol Exp Ther* (in press) August 1974
22. Altura BM, Altura BT, Hershey SG: Mechanisms of corticosteroid protection in shock. *Clin Res* 21:398, 1973
23. Altura BM, Altura BT, Hershey SG: Pharmacodynamic action of corticosteroids on the microcirculation and vascular smooth muscle, Steroids and Shock. Edited by TM Glenn. Baltimore, University Park Press, 1974, chapter 5
24. Altura BM, Hershey SG: Use of reticuloendothelial phagocytic function as an index in shock therapy. *Bull NY Acad Med* 43:259-266, 1967
25. Altura BM, Hershey SG: RES phagocytic function in trauma and adaptation to shock. *Am J Physiol* 215:1414-1419, 1968
26. Altura BM, Hershey SG: Acute intestinal ischemia shock and reticuloendothelial system function. *RES. J Reticuloendothel Soc* 10:361-371, 1971
27. Altura BM, Hershey SG: Sequential changes in reticuloendothelial system function after acute hemorrhage. *Proc Soc Exp Biol Med* 139:935-939, 1972
28. Altura BM, Hershey SG, Mazzia VDB: Microcirculatory approach to vasopressor therapy in intestinal ischemia (SMA) shock. *Am J Surg* 111:186-192, 1966
29. Altura BM, Zweifach BW: Antihistamines and vascular reactivity. *Am J Physiol* 209:545-549, 1965
30. Altura BM, Zweifach BW: Pharmacologic properties of antihistamines in relation to vascular reactivity. *Am J Physiol* 209:550-556, 1965
31. Altura BM, Zweifach BW: Influence of reserpine and guanethidine on vascular reactivity and antihistamine constrictor action in the microcirculation. *Angiology* 17:493-502, 1966
32. Altura BM, Zweifach BW: Endogenous histamine formation and vascular reactivity. *Am J Physiol* 212:559-564, 1967
33. Altura BT: Distribution and Release of Calcium in Frog Nerve. Ph.D. Thesis. New York, City University of New York, 1968
34. Altura BT, Altura BM: Differential effects of anoxia and substrate depletion on drug-induced contractions of vascular smooth muscle. *Physiologist* 15:72, 1972
35. Ash ASF, Schild HO: Receptors mediating some actions of histamine. *Br J Pharmacol* 27:427-438, 1966
36. Ashton N, Cooke C: *In vivo* observations of the effect of cortisone upon the blood vessels in rabbit ear chambers. *Br J Exp Pathol* 33:445-450, 1952
37. Åström A, Persson NH: The toxicity of some local anesthetics after application on different mucous membranes and its relation to anesthetic action on the nasal mucosa of the rabbit. *J Pharmacol Exp Ther* 132:87-90, 1961
38. Aviado DM: Sympathomimetic Drugs. Springfield Ill., Charles C Thomas, 1970
39. Baez S, Lorenzo J, Orkin LR: Interference by histamine and beta-histidine HCl with hydrocortisone potentiation of responses to epinephrine, norepinephrine and methoxamine in single smooth muscle cell *in situ*. *Physiologist* 13:140, 1970
40. Baxter JD, Forsham PH: Tissue effects of glucocorticoids. *Am J Med* 53:573-589, 1972
41. Bentley AJ, Jackson RT: Changes in the potency of the upper nasal passage induced by histamine and antihistamines. *Laryngoscope* 80:1859-1870, 1970
42. Besse JC, Bass AD: Potentiation by hydrocortisone of responses to catecholamines in

- vascular smooth muscle. *J Pharmacol Exp Ther* 154:224-238, 1966
43. Bianchi CP, Bolton TC: Action of local anesthetics on coupling systems in muscle. *J Pharmacol Exp Ther* 157:388-405, 1967
  44. Binet L, Burstein M: Etude expérimentale de quelques substances vasodilatrices injectées par voie intraartérielle. *Nouv Presse Med Paris* 57:929-931, 1949
  45. Black JW, Duncan WAM, Durant CJ, et al: Definition and antagonism of histamine H<sub>2</sub>-receptors. *Nature* 236:385-390, 1972
  46. Blaustein MP, Goldman DE: Competitive action of calcium and procaine on lobster axon. A study of the mechanism of action of certain local anesthetics. *J Gen Physiol* 49:1043-1063, 1966
  47. Bohr DF: Individualities among vascular smooth muscles, Electrolytes and Cardiovascular Diseases. Edited by E Bajusz. Basel, Karger, 1965, pp 342-355
  48. Bohr DF, Greenberg S, Bonacoursi A: Mechanism of action of vasoactive agents, Microcirculation. Edited by G Kaley, BM Altura. Baltimore, University Park Press (in press)
  49. Bondani A, Karler R: Interaction of calcium and local anesthetics with skeletal muscle microsomes. *J Cell Physiol* 75:199-211, 1970
  50. Bondy PK: The adrenal cortex, Duncan's Diseases of Metabolism. Edited by PK Bondy. Philadelphia, Saunders, 1971, p 843
  51. Brody MJ, Kadowitz PJ: Prostaglandins as modulators of the autonomic nervous system. *Fed Proc* 33:48-60, 1974
  52. Bruns DL, Connolly JD: A comparative study of the effectiveness of adrenal cortical compounds in hemorrhagic shock. *Surg Forum* 10:382-385, 1960
  53. Burger A: Medicinal Chemistry. Third edition. Part II. New York, Wiley-Interscience, 1970
  54. Cass R, Marshall PB: Effect of adrenocortical hormones on tissue histamine and 5-hydroxytryptamine in the rat. *Arch Int Pharmacodyn* 86:311-332, 1962
  55. Christy NP (editor): The Human Adrenal Cortex. New York, Harper and Row, 1971
  56. Covino BG: Comparative clinical pharmacology of local anesthetic agents. *ANESTHESIOLOGY* 35:158-167, 1971
  57. Crescitelli F, Geissman TA: Certain effects of antihistamines and related compounds on frog nerve fibers. *Am J Physiol* 164:509-519, 1951
  58. de Jong RH: Physiology and Pharmacology of Local Anesthesia. Springfield, Ill., Charles C Thomas, 1970
  59. Desmonts J-M, Pocard J-J: Utilisation des corticoïdes à doses massives dans le choc. Bases expérimentales et étude critique. *Nouv Presse Med* 1:2671-2676, 1972
  60. Dews PB, Graham JDP: The antihistamine substance 2786 R.P. *Br J Pharmacol* 1: 278-286, 1946
  61. Dragstedt CA: Histamine and antihistamines, Pharmacology in Medicine. Edited by VA Drill. New York, McGraw-Hill Co., 1958, pp 626-630
  62. Dhunér K-G, Lewis DH: Effect of local anaesthetics and vasoconstrictors upon regional blood flow. *Acta Anaesth Scand suppl XXIII: 347-352, 1966*
  63. du Mesnil de Rochemont W, Hense H: Messung der Hautdurchblutung an Menschen bei Einwirkung verschiedener Lokalanästhetica. *Arch Exp Pathol Pharmacol* 239:464-474, 1960
  64. Feinstein MB: Inhibition of caffeine rigor and radioactive movements by local anesthetics in frog sartorius muscle. *J Gen Physiol* 47:151-172, 1963
  65. Feinstein MB: Inhibition of contraction and calcium exchangeability in rat uterus by local anesthetics. *J Pharmacol Exp Ther* 152: 516-524, 1966
  66. Fink BR, Kenny GE, Simpson WE: Depression of oxygen uptake in cell culture by volatile, barbiturate and local anesthetics. *ANESTHESIOLOGY* 30:150-157, 1969
  67. Fleckenstein A: A quantitative study of antagonists of adrenaline on the vessels of the rabbit's ear. *Br J Pharmacol* 7:553-562, 1952
  68. Fleisch JH, Titus E: Effect of local anesthetics on pharmacologic receptor systems of smooth muscle. *J Pharmacol Exp Ther* 186: 44-51, 1973
  69. Fowler NO, Chou NHF: Potentiation of smooth muscle contraction by adrenal steroids. *Circ Res* 9:153-156, 1961
  70. Fritz I, Levine R: Action of adrenal cortical steroids and norepinephrine on vascular response of stress in adrenalectomized rats. *Am J Physiol* 165:456-465, 1961
  71. Glenn TM (editor): Steroids and Shock. Baltimore, University Park Press, 1974
  72. Glenn TM, Lefer AM: Role of lysosomes in the pathogenesis of splanchnic ischemia shock in cats. *Circ Res* 27:783-797, 1970
  73. Glenn TM, Lefer AM: Anti-toxin action of methylprednisolone in hemorrhagic shock. *Eur J Pharmacol* 13:230-238, 1971
  74. Glenn TM, Lefer AM, Bardsley AC, et al: Circulatory responses to the infusion of splanchnic lysosomal hydrolases in the dog. *Ann Surg* 176:120-127, 1972
  75. Glick G, Wechsler AS, Epstein SE: Mechanism of reflex vasodilatation: Assessments of the role of neuronal reuptake of norepinephrine and release of histamine. *J Clin Invest* 47: 511-520, 1968
  76. Godfraind T, Kaba A, Van Dorsser W: The action of cinnarizine on the contraction induced by calcium in depolarized arterial and intestinal smooth muscle preparations. *Arch Int Pharmacodyn* 197:399-400, 1972
  77. Goodman LS, Gilman A: The Pharmacological Basis of Therapeutics. Fourth edition. New York, Macmillan, 1970, chapter 72
  78. Gozsy B, Kato L: Studies on Phagocytic Stimulation. Montréal, Thérien Frères Limitée, 1957

79. Graham BH, Lioy F: Histaminergic vasodilatation in the hindlimb of the dog. *Pfluegers Arch* 342:307-318, 1973
80. Grant L, Palmer P, Sanders AG: The effect of heparin on the sticking of white cells to endothelium in inflammation. *J Pathol* 83:127-133, 1962
81. Hapke M, Green R: Studies on the mechanism of epinephrine potentiation by hydrocortisone in aortic strips of the rabbit. *Fed Proc* 29:613, 1970
82. Hakstian RW, Hampson LG, Gurd FN: Pharmacological agents in experimental shock. *Arch Surg* 83:335-346, 1961
83. Haranath PSRK: Comparative study of the local and spinal anaesthetic actions of some antihistamines, mepyramine and phenergan with procaine. *Indian J Med Sci* 8:547-555, 1954
84. Hauge A, Staub NC: Prevention of hypoxic vasoconstriction in cat lung by histamine-releasing agent 48/80. *J Appl Physiol* 26: 693-699, 1969
85. Heim F: Zur Wirkungsweise intravenös gegebenen Novocains und verwandter Verbindungen. Naunyn Schmiedebergs Arch Pharmacol 212:277-283, 1951
86. Hershey SG, Altura BM: Vasopressors and low-flow states, Pharmacology of Adjuvant Drugs. Edited by HL Zauder. Philadelphia, F.A. Davis Co., 1973, chapter 3
87. Hewer AJH, Keele CA: A method of testing analgesics in man. *Lancet* 2:683-688, 1948
88. Hudgins PM, Weiss GB: Differential effects of calcium removal upon vascular smooth muscle contraction induced by norepinephrine, histamine and potassium. *J Pharmacol Exp Ther* 159:91-97, 1968
89. Hyman AL: The effects of lidocaine, hexamethonium and  $\alpha$  and  $\beta$  adrenergic blocking agents on the pulmonary veins in intact dogs. *J Pharmacol Exp Ther* 174: 487-499, 1970
90. Isaac L, Goth A: The mechanism of the potentiation of norepinephrine by antihistaminics. *J Pharmacol Exp Ther* 156:463-468, 1967
91. Janoff A: Alterations on lysosomes (intracellular enzymes) during shock; effects of preconditioning (tolerance) and protective drugs. Shock. Edited by SG Hershey. Boston, Little Brown and Co., 1964, pp 93-111
92. Janoff A: Mediators of tissue damage in human polymorphonuclear neutrophils *Ser Haematol* 3 (no. 1): 96-130, 1970
93. Jasani MK: Possible modes of action of ACTH and glucocorticoids in allergic diseases. *Clin Allergy* 2:1-41, 1972
94. Jorfeldt L, Löfström B, Pernow B, et al: The effects of local anesthetics on the central circulation and the respiration in man and dog. *Acta Anaesthesiol Scand* 12:153-169, 1968
95. Jorfeldt L, Löfström B, Pernow B, et al: The effect of mepivacaine and lidocaine on forearm resistance and capacitance vessels in man. *Acta Anaesthesiol Scand* 14:183-201, 1970
96. Judah JD: Antihistamines and mitochondrial swelling. *Exp Cell Res* 19:404-407, 1960
97. Judah JD: Action of antihistamine and other drugs on ion and water movement in cells and mitochondria. *Fed Proc* 21:1097-1099, 1962
98. Kadowitz PJ, Yard AC: Circulatory effects of hydrocortisone and protection against endotoxin shock in cats. *Eur J Pharmacol* 9:311-318, 1970
99. Kadowitz PJ, Yard AC: Influence of hydrocortisone on cardiovascular responses to epinephrine. *Eur J Pharmacol* 13:281-286, 1971
100. Kalsner S: Mechanism of hydrocortisone potentiation of responses to epinephrine and norepinephrine in rabbit aorta. *Circ Res* 24: 383-395, 1969
101. Krause DE: Ein Beitrag zum Wirkungsmechanismus des Novocains bei intravenöser Injektion. Naunyn Schmiedebergs Arch Pharmacol 213:516-536, 1951
102. Kuperman AS, Altura BT, Chezaz JA: Action of procaine on calcium efflux from frog nerve and muscle. *Nature* 217:673-675, 1968
103. Kurland GS, Freedberg AS: The potentiating effect of ACTH and of cortisone on pressor response to intravenous infusion of L-norepinephrine. *Proc Soc Exp Biol Med* 78:28-31, 1951
104. Laborit H, Huguenard P: *Pratique de L'hibernothérapie en Chirurgie et en Médecine*. Paris, Masson, 1954
105. Le Comte J, Grevisse J, Beaumariage ML: Potentiation par l'hydrocortisone des effets moteurs de l'adrénaline. *Arch Int Pharmacodyn* 119:133-141, 1959
106. Lefer AM, Martin J: Mechanism of the protective effect of corticosteroids in hemorrhagic shock. *Am J Physiol* 216:314-320, 1969
107. Lefer AM, Verriers RL: Role of corticosteroids in the treatment of circulatory collapse states. *Clin Pharmacol Ther* 11:630-655, 1970
108. Levin JA, Bartlett JD Jr, Beck L: Active reflex vasodilatation induced by intravenous epinephrine or norepinephrine in primates. *J Pharmacol Exp Ther* 161:262-270, 1968
109. Lillehei RC, Longerbeam JK, Bloch J, et al: Nature of irreversible shock: Experimental and clinical observations. *Ann Surg* 160: 682-736, 1964
110. Lloyd TC:  $P_{O_2}$ -dependent pulmonary vasoconstriction caused by procaine. *J Appl Physiol* 21:1439-1442, 1966
111. Loew ER: The pharmacology of benadryl and the specificity of antihistamine drugs. *Ann NY Acad Sci* 50:1142-1160, 1950



112. Lorković H: Effects of some membrane-stabilizing agents on the mechanical response to potassium of frog muscles. *Arch Int Pharmacodyn* 146:266-274, 1963
113. Lüttgau HC, Oetliker H: The action of caffeine on the activation of the contractile mechanism in striated muscles. *J Physiol* 194:51-74, 1968
114. Madan BR, Pendse VK: Some cardiovascular actions of cyclizine, chlorcyclizine and homochlorcyclizine. *Indian J Physiol Pharmacol* 13:113-121, 1969
115. Mason RC, Read MS: Effects of some membrane-active and other compounds on thrombin-induced platelet aggregation. *Experientia* 27:1218-1220, 1971
116. Meyer RA, Jakubowski W: Use of tripelenamine and diphenhydramine as local anesthetics. *J Am Dent Assoc* 69:32-37, 1964
117. Mutsay GJ, Alho A, Jaeger T, et al: Effects of corticosteroids on the circulation in shock: Experimental and clinical results. *Fed Proc* 29:1861-1873, 1970
118. Murray JR, Huston MJ: The effect of diphenhydramine HCl (Benadryl HCl) on skeletal muscle. *Arch Int Pharmacodyn* 89:204-208, 1952
119. Nakano J: Cardiovascular actions, The Prostaglandins. Edited by PW Ramwell. New York, Plenum, 1973, volume 1, chapter 9
120. Nishimura N, Morioka T, Sato S, et al: Effects of local anesthetic agents on the peripheral vascular system. *Anesth Analg (Cleve)* 44:135-139, 1965
121. Northover BJ: The effect of drugs on the constriction of isolated depolarized blood vessels in response to calcium or barium. *Br J Pharmacol* 34:417-428, 1968
122. Page IH, Bumpus FM (editors): *Handbook of Experimental Pharmacology*, volume 37, Angiotensin. New York, Springer-Verlag, 1974
123. Paton WDM: Histamine release by compounds of simple chemical structure. *Pharmacol Rev* 9:269-328, 1957
124. Pierce CH, Briggs BT, Gutelius JR: Methylprednisolone and phenox benzamine in experimental shock: Cardiovascular dynamics and platelet function, Shock in Low- and High-flow States. Edited by BK Forscher, RC Lillehei, SS Stubbs. Amsterdam, Excerpta Medica, 1972, pp 183-195
125. Pohio M, Scheinin A: Microscopic observations on living dental pulp. I. Method for intravital study of circulation in rat incisor pulp. *Acta Odont Scand* 16:303-314, 1958
126. Räsänen T, Cederberg A: The vascular response to adrenalin in the mesentery of rats after dexamethasone treatment. *Ann Med Exp Fenn* 42:22-26, 1964
127. Rees KR: Cellular injury by drugs, *Ciba Foundation Symposium on Enzymes and Drug Action*. Edited by JL Mongar, AVS de Reuck. Boston, Little, Brown, and Co., 1962, pp 344-358
128. Reichard SM, Edelmann A, Gordon AS: Adrenal and hypophyseal influences upon the uptake of radioactive gold (Au<sup>199</sup>) by the reticuloendothelial system. *Endocrinology* 59:55-68, 1956
129. Reichgott MJ, Melmon KL: Should corticosteroids be used in shock? *Med Clin North Am* 57:1211-1223, 1973
130. Reilly MA, Schayer RW: Effect of glucocorticoids on histamine metabolism in mice. *Br J Pharmacol* 45:463-469, 1972
131. Reis DJ: Potentiation of the vasoconstrictor action of topical norepinephrine on the human bulbar conjunctival vessels after topical application of certain adreno-corticotropic hormones. *J Clin Endocrinol* 20:446-456, 1960
132. Ritchie JM, Greengard P: On the mode of action of local anesthetics. *Annu Rev Pharmacol* 6:405-430, 1966
133. Rocha e Silva M, Leme JG: *Chemical Mediators of the Acute Inflammatory Reaction*. New York, Pergamon, Press, 1972
134. Sai Y: The action of certain bronchial asthma remedies on the pulmonary circulation. *Ikagu Kenkyu* 24:1278-1284, 1954
135. Sams WM, Winkelmann RK: Effect of corticosteroids on isolated vascular smooth muscle. *J Invest Dermatol* 49:519-525, 1967
136. Sanders HD: The vasoconstrictor and vasodilator effects of procaine. *Can J Physiol Pharmacol* 43:39-46, 1965
- 136a. Sanders HD: Procaine-induced contraction in vein and its modification by drugs. *Can J Physiol Pharmacol* 47:218-221, 1969
137. Schär B, Meier R: Dependence of leukocyte migration and their increase by proteus lipopolysaccharides on the glucose concentration of the medium. *Experientia* 17:27-28, 1961
138. Schaumann O: *Chemie und Pharmakologie der Lokalanesthetica*. Naunyn Schmiedeberg's Arch Pharmacol 190:30-41, 1938
139. Schayer RW: Histidine decarboxylase in mast cells. *Ann NY Acad Sci* 103:164-178, 1963
140. Schayer RW: Histamine and autonomous responses of the microcirculation: Relationship to glucocorticoid action. *Ann NY Acad Sci* 116:891-898, 1964
141. Schayer RW, Smiley RL, Davis KJ: Inhibition by cortisone of the binding of new histamine in rat tissues. *Proc Soc Exp Biol Med* 87:590-592, 1954
142. Schmid PG, Eckstein JW, Abboud FM: Comparison of effects of deoxycorticosterone and dexamethasone on cardiovascular responses to norepinephrine. *J Clin Invest* 46:590-598, 1967
143. Schumer W, Kapica SK, Teng TL: Validity of the lysosomal theory in oligemic shock. *Arch Surg* 99:325-329, 1969
144. Schumer W, Nyhus LM: The role of corticoids

- in the management of shock. *Surg Clin North Am* 49:147-162, 1969
145. Schummer W, Nylhus LM: Corticosteroid effect on biochemical parameters of human oligemic shock. *Arch Surg* 100:405-408, 1970
  146. Seeman P: The membrane actions of anesthetics and tranquilizers. *Pharmacol Rev* 24:583-655, 1972
  147. Slater TF, Greenbaum AL: Changes in lysosomal enzymes in acute experimental liver injury. *Biochem J* 96:484-491, 1965
  148. Smith NT, Corbascio AN: The use and misuse of pressor agents. *ANESTHESIOLOGY* 33:58-101, 1970
  149. Solti F, Iskum M, Máthé Z, et al: Effect of procaine on coronary circulation. *Acta Physiol Acad Sci Hung* 21:353-357, 1962
  150. Somlyo AP, Somlyo AV: Vascular smooth muscle. II. Pharmacology of normal and hypertensive vessels. *Pharmacol Rev* 22:249-353, 1970
  151. Somlyo AV, Sandberg RL, Somlyo AP: Pharmacologically heterogeneous smooth muscle cell distribution in blood vessels. *J Pharmacol Exp Ther* 149:106-112, 1965
  152. Spath JA, Gorczynski RJ, Lefler AM: Possible mechanisms of the beneficial action of glucocorticoids in circulatory shock. *Surg Gynecol Obstet* 137:597-607, 1973
  153. Suarez-Kurtz G, Bianchi CP, Krupp P: Effects of local anesthetics on radioactive binding on nerve. *Eur J Pharmacol* 10:91-100, 1970
  154. Suddick RP: Glucocorticoid-kinin antagonism in the rat. *Am J Physiol* 211:844-850, 1966
  155. Symons AM, Lewis DA, Ancil RJ: Stabilization of anti-inflammatory steroids on lysosomes. *Biochem Pharmacol* 18:2581-2582, 1969
  156. Telford JM, West GB: Some aspects of experimental allergy. Part II. *Int Arch Allergy* 23:29-58, 1963
  157. Thompson EB, Lippman ME: Mechanism of action of glucocorticoids. *Metabolism* 23:159-202, 1974
  158. Tobia AJ, Adams MD, Miya TS, et al: Histamine and reflex vasodilatation in the rat. *Life Sci* 8:745-750, 1969
  159. Tobia AJ, Adams MD, Miya TS, et al: Altered reflex vasodilatation in the hypertensive rat: Possible role of histamine. *J Pharmacol Exp Ther* 175:619-626, 1970
  160. Thyrum PT, Luchi RJ, Conn HL: The complex formation of procaine and procaine amide with adenosine triphosphate. *J Pharmacol Exp Ther* 164:239-251, 1968
  161. Vernon-Roberts B: *The Macrophage*. Cambridge, Cambridge University Press, 1972
  162. Vignani I: The inhibitory effect of histamine on mast cell damage induced by antihistamines. *Experientia* 23:834-835, 1967
  163. Watts DT: The effect of local anesthetics on the respiration of brain homogenates. *J Pharmacol Exp Ther* 96:325-331, 1949
  164. Weeks JR: Prostaglandins. *Annu Rev Pharmacol* 12:317-336, 1973
  165. Weil MH, Whigham H: Corticosteroids for reversal of hemorrhagic shock in rats. *Am J Physiol* 209:815-818, 1965
  166. Weissman G, Thomas L: Studies on lysosomes. I. The effects of endotoxin, endotoxin tolerance, and cortisone on the release of acid hydrolases from a granular fraction of rabbit liver. *J Exp Med* 116:433-450, 1962
  167. West GB: *Edema and 5-hydroxytryptamine in the rat*. 5-Hydroxytryptamine, Edited by GP Lewis. Oxford, Pergamon, 1958, pp 169-171
  168. Wiedling S: *Sylocaine. The Pharmacological Basis of Its Clinical Use*. Second edition. Stockholm, Almqvist and Wiksell, 1964
  169. Williams PB, Hudgins PM: Actions of hydrocortisone, desoxycorticosterone acetate and progesterone on <sup>14</sup>C-norepinephrine uptake and metabolism by rabbit aorta. *Pharmacology* 9:262-269, 1973
  170. Wilson JW, Ratliff NB, Hackel DB: The lung in hemorrhagic shock. I. *In vivo* observations of pulmonary microcirculation in cats. *Am J Pathol* 58:337-353, 1970
  171. Wilson RF, Fisher RR: The hemodynamic effects of massive steroids in clinical shock. *Surg Gynecol Obstet* 127:769-776, 1968
  172. Woodruff P, Cardis D, Cuevas P, et al: Corticosteroid treatment of major trauma. *Arch Surg* 107:613-616, 1973
  173. Wylie WD, Churchill-Davidson HC: *A Practice of Anesthesia*, Third edition. London, Lloyd-Luke Medical Books Ltd., 1972, pp 1009-1012
  174. Yamanaka I, Dowdy EG: The effects of ketamine on spiral-cut strips of rabbit aorta. *ANESTHESIOLOGY* 40:222-227, 1974
  175. Yamasaki H, Yamamoto T: Inhibitory effect of adrenal glucocorticoids on histamine release. *Jap J Pharmacol* 13:223-224, 1963
  176. Zimmerman BG: Drug action on peripheral vascular system. *Annu Rev Pharmacol* 12:125-140, 1972
  177. Zweifach BW: Circulatory changes in the peripheral vascular bed following local injury. *Mechanism of Inflammation*. Edited by E Bajusz. Montreal, Acta, 1953, pp 77-84
  178. Zweifach BW: Microcirculatory derangements as a basis for the lethal manifestations of experimental shock. *Br J Anaesth* 30:466-484, 1958
  179. Zweifach BW: *Functional Behavior of the Microcirculation*. Springfield, Ill., Charles C Thomas, 1961
  180. Zweifach BW, Shorr E, Black MM: The influence of the adrenal cortex on behavior of terminal vascular bed. *Ann NY Acad Sci* 56:626-633, 1953
